# Supplementary material for: Magnetic relaxation in mononuclear Tb complex involving a nitronyl nitroxide ligand
Source: Royal Society of Chemistry journal article supplement (doi:10.1039/c4nj00627e), 2014-01-01
Supplement: c4nj00627e1.pdf [file c4nj00627e1.pdf]

## Supporting Information

### Magnetic relaxation in mononuclear Tb complex involving nitronyl nitroxide ligand

Peng Hu,<sup>a</sup> Zan Sun,<sup>a</sup> Xiufeng Wang,<sup>a</sup> Licun Li,<sup>\*a</sup> Daizheng Liao,<sup>a</sup> Dominique Luneau<sup>\*b</sup>

<sup>a</sup>Department of Chemistry, Key Laboratory of Advanced Energy Materials Chemistry, Tianjin Key Laboratory of Metal and Molecule-based Material Chemistry, and Collaborative Innovation Center of Chemical Science and Engineering (Tianjin), Nankai University, Tianjin 300071, China

<sup>b</sup>Laboratoire des Multimatériaux et Interfaces (UMR 5615), Université Claude Bernard Lyon 1, Campus de la Doua, 69622 Villeurbanne cedex, France

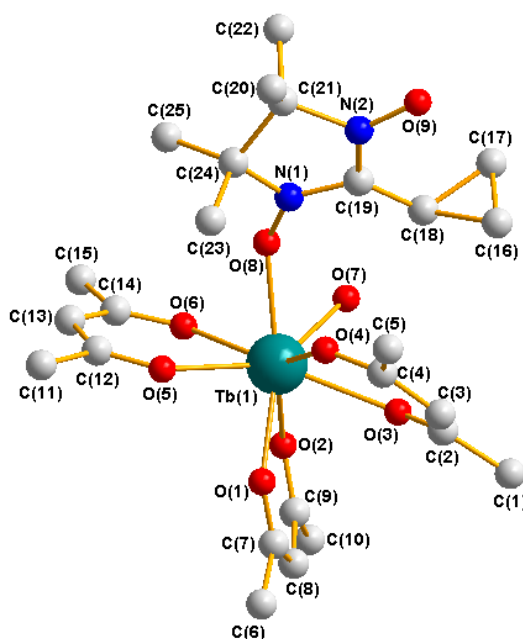

Fig. S1 Perspective view of complex  $[\text{Tb}(\text{hfac})_3(\text{NIT}-\text{C}_3\text{H}_5)(\text{H}_2\text{O})](2)$ . H and F atoms were omitted for clarity.

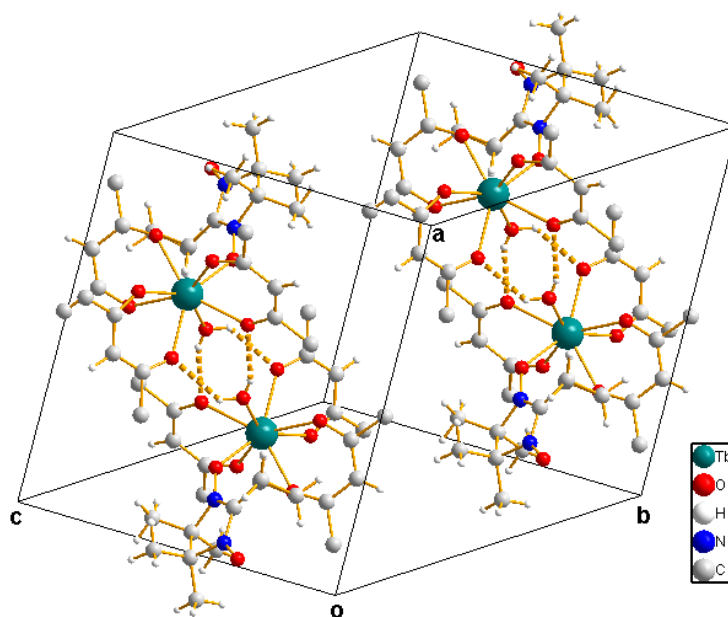

Fig. S2 The hydrogen bonds of complex 2.

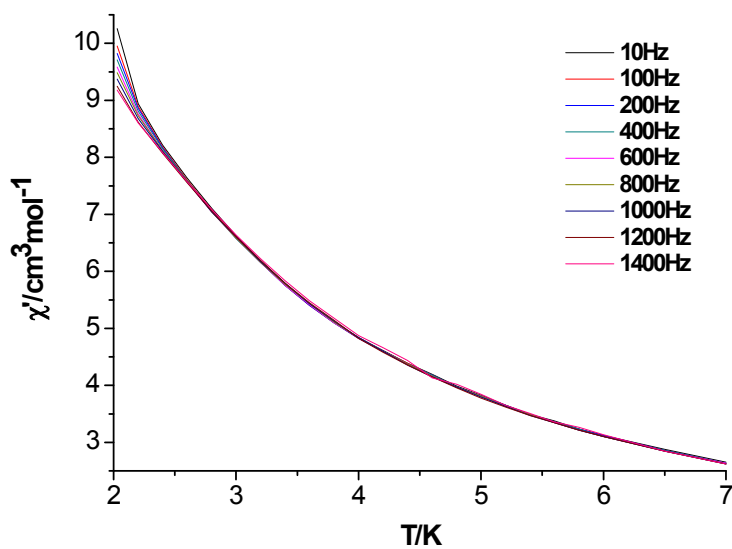

Fig. S3 Temperature dependence of in-phase components of the ac magnetic susceptibility in zero dc field with an oscillation 2.7 Oe for complex 2.

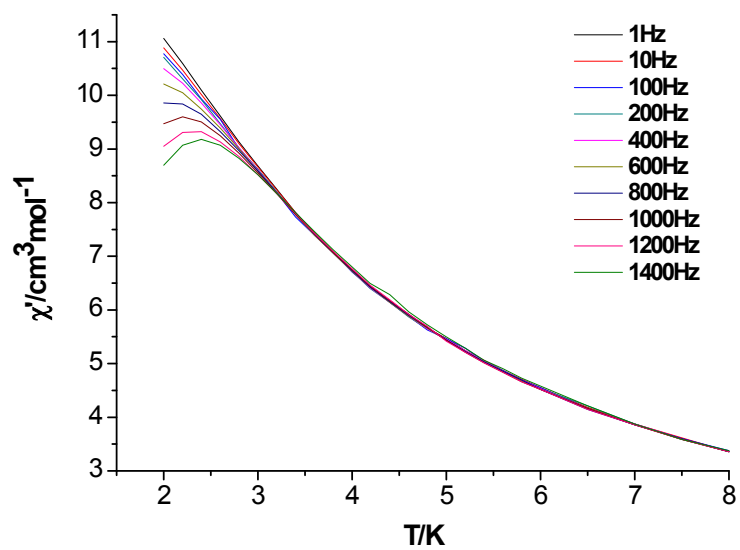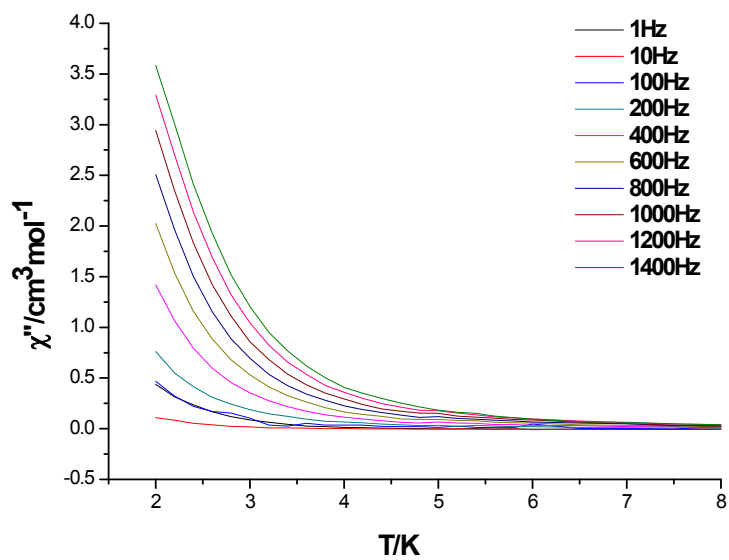

Fig. S4 Temperature dependence of in-phase (up) and out-of-phase (down) components of the ac magnetic susceptibility in 1000 Oe dc field with an oscillation 2.7 Oe for complex **2**.

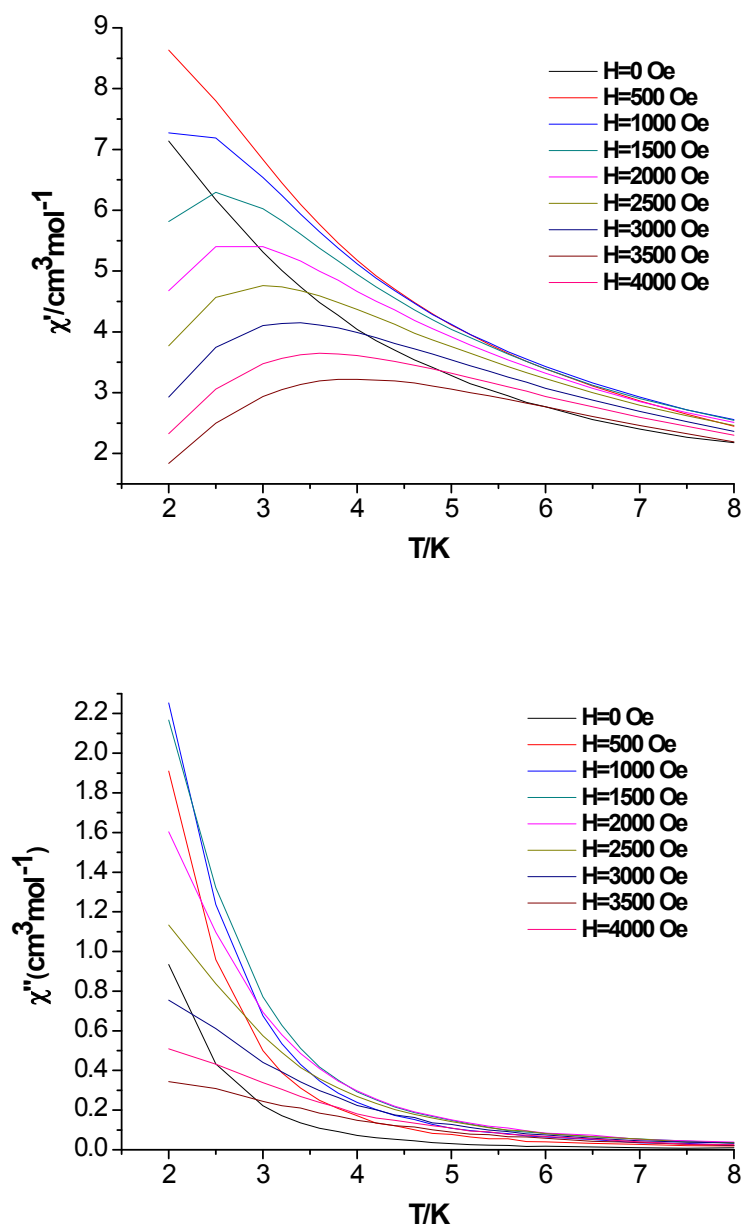

Fig. S5 Temperature dependence of in-phase (up) and out-of-phase (down) components of the ac magnetic susceptibility in different dc field with an oscillation 2.7 Oe for complex 2.

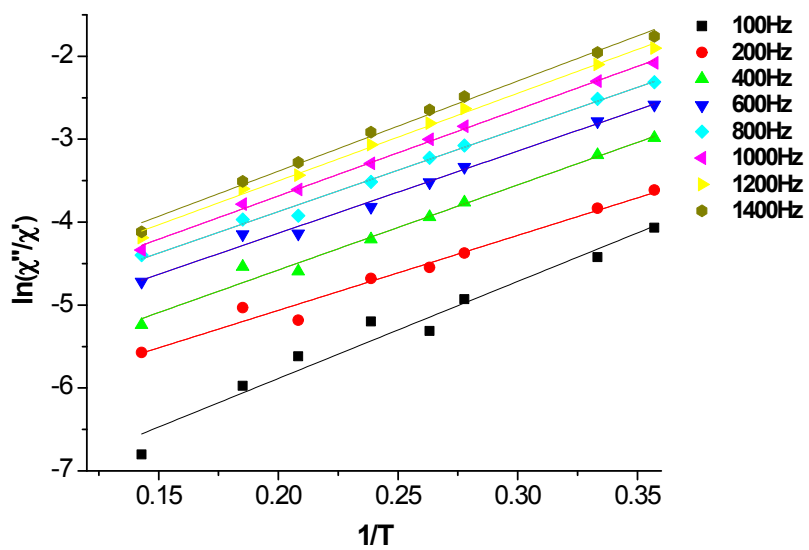

Fig. S6 Plots of natural logarithm of  $\ln(\chi''/\chi')$  vs  $1/T$  for 2(1.0kOe dc field). The solid lines represent the fitting results.
